# Supplementary material
Source: publisher site journal article supplement (https://www.dovepress.com/article/604803)
Supplement: Supplementary file 1 [file 604803%20Supplementary%20Material.docx]

**Supplementary Table S1. Univariate logistic regression analysis of all candidate risk factors for residual leg pain after percutaneous transforaminal endoscopic decompression in frail elderly patients (n=152**).

| **Variable** | **Category/Unit** | **Odds Ratio (OR)** | **95% Confidence Interval** | **P-value** |
| --- | --- | --- | --- | --- |
| **Demographic Characteristics** |  |  |  |  |
| Age | Per year | 1.001 | 0.911-1.101 | 0.976 |
| Male sex | Male vs. female | 0.75 | 0.265-2.12 | 0.467 |
| Body mass index | Per kg/m² | 1.01 | 0.91-1.13 | 0.804 |
| **Clinical Characteristics** |  |  |  |  |
| Charlson Comorbidity Index | Per point | **1.39** | **1.14-1.7** | **0.019** |
| ASA classification III | ASA III vs. II | **4.43** | **2.39–7.71** | **0.002** |
| FRAIL score ≥4 | ≥4 vs. 3 | **15.40** | **3.53–67.17** | **<0.001** |
| **Anatomical Characteristics** |  |  |  |  |
| Central canal stenosis | Severe vs. non-severe | 1.03 | 0.48-2.22 | 0.939 |
| Pfirrmann classification | Per grade | **4.29** | **2.39-7.71** | **<0.001** |
| Pedicle rotation | Present vs. absent | **4.09** | **1.79-9.34** | **<0.001** |
| Scoliosis | Present vs. absent | **4.43** | **2.01-9.78** | **<0.001** |
| Kyphosis | Present vs. absent | 1.29 | 0.56–2.96 | 0.557 |
| Lateral recess stenosis | Severe vs. non-severe | 2.24 | 0.50–10.02 | 0.291 |
| Foraminal stenosis | Severe vs. non-severe | 1.09 | 0.48–2.47 | 0.846 |
| Index level L5/S1 | L5/S1 vs. L4/5 | **2.51** | **1.067-5.89** | **0.035** |
| Index level L3/4 | L3/4 vs. L4/5 | 0.92 | 0.102-8.31 | 0.941 |
| **Baseline Functional Status** |  |  |  |  |
| Preoperative VAS leg pain | Per point | **0.36** | **0.15-0.84** | **0.017** |
| Preoperative ODI | Per point | **1.18** | **1.09–1.28** | **<0.001** |
| Preoperative ADL | Per point | **0.72** | **0.62–0.85** | **<0.001** |

Abbreviations: OR, odds ratio; ASA, American Society of Anesthesiologists; VAS, visual analogue scale; ODI, Oswestry Disability Index; ADL, activities of daily living.

Notes: 1.All associations are from univariate logistic regression models without adjustment for other variables. 2.Bold values indicate statistically significant associations (P < 0.05). 3.Continuous variables (age, BMI, Charlson Comorbidity Index, Pfirrmann classification, VAS, ODI, ADL) are presented as odds ratio per unit increase. 4.Categorical variables are presented as odds ratio for the presence vs. absence of the characteristic, unless otherwise specified.5. The reference categories are: female for sex, ASA II for ASA classification, FRAIL score 3 for frailty, non-severe for stenosis categories, absent for deformity characteristics, L4/5 for index level. 6.These exploratory findings should be interpreted with caution due to multiple comparisons and lack of adjustment for potential confounding.
